# Supplementary material for: Dietary protocatechuic acid redistributes tight junction proteins by targeting Rho-associated protein kinase to improve intestinal barrier function
Source: Royal Society of Chemistry journal article supplement (doi:10.1039/d3fo00605k), 2023-01-01
Supplement: d3fo00605k3.pdf [file d3fo00605k3.pdf]

## Uncropped version of western blot protein bands

|                                                                                                                                                                                                                                                                                                |                                                                                                                                                                                                                                                                                                 |
|------------------------------------------------------------------------------------------------------------------------------------------------------------------------------------------------------------------------------------------------------------------------------------------------|-------------------------------------------------------------------------------------------------------------------------------------------------------------------------------------------------------------------------------------------------------------------------------------------------|
| 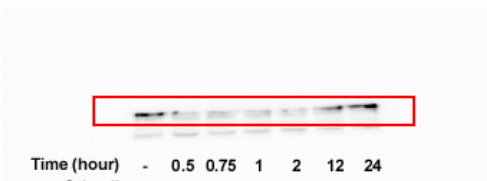 <p style="text-align: center;">                 Time (hour) - 0.5 0.75 1 2 12 24<br/>                 Stimuli - + + + + + +             </p>                                                                 |  <p style="text-align: center;">                 Time (hour) - 0.5 0.75 1 2 12 24<br/>                 Stimuli - + + + + + +             </p>                                                                 |
| Figure2A ZO-1                                                                                                                                                                                                                                                                                  | Figure2A Occludin                                                                                                                                                                                                                                                                               |
|  <p style="text-align: center;">                 Time (hour) - 0.5 0.75 1 2 12 24<br/>                 Stimuli - + + + + + +             </p>                                                                 |  <p style="text-align: center;">                 Time (hour) - 0.5 0.75 1 2 12 24<br/>                 Stimuli - + + + + + +             </p>                                                                 |
| Figure2A Claudin-2                                                                                                                                                                                                                                                                             | Figure2A Claudin-4                                                                                                                                                                                                                                                                              |
|  <p style="text-align: center;">                 Time (hour) - 0.5 0.75 1 2 12 24<br/>                 Stimuli - + + + + + +             </p>                                                               |  <p style="text-align: center;">                 Time (hour) - 0.5 0.75 1 2 12 24<br/>                 Stimuli - + + + + + +             </p>                                                               |
| Figure2A E-cadherin                                                                                                                                                                                                                                                                            | Figure2A $\beta$ -actin                                                                                                                                                                                                                                                                         |
|  <p style="text-align: center;">                 Time (hour) - 0.5 0.75 1 2<br/>                 Stimuli - + + + + + + +<br/>                 PCA (50 <math>\mu</math>M) - - + - + - + - +             </p> |  <p style="text-align: center;">                 Time (hour) - 0.5 0.75 1 2<br/>                 Stimuli - + + + + + + +<br/>                 PCA (50 <math>\mu</math>M) - - + - + - + - +             </p> |
| Figure2B ZO-1                                                                                                                                                                                                                                                                                  | Figure2B Occludin                                                                                                                                                                                                                                                                               |

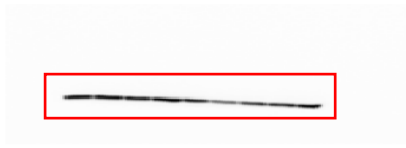

|             |   |     |      |   |   |
|-------------|---|-----|------|---|---|
| Time (hour) | - | 0.5 | 0.75 | 1 | 2 |
| Stimuli     | - | +   | +    | + | + |
| PCA (50 μM) | - | -   | +    | - | + |

Figure2B Claudin-2

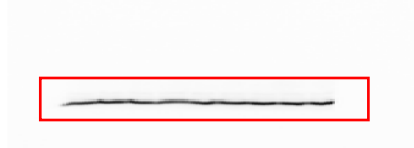

|             |   |     |      |   |   |
|-------------|---|-----|------|---|---|
| Time (hour) | - | 0.5 | 0.75 | 1 | 2 |
| Stimuli     | - | +   | +    | + | + |
| PCA (50 μM) | - | -   | +    | - | + |

Figure2B Claudin-4

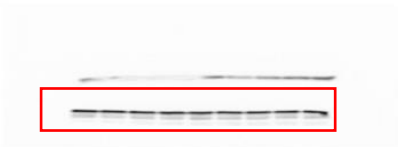

|             |   |     |      |   |   |
|-------------|---|-----|------|---|---|
| Time (hour) | - | 0.5 | 0.75 | 1 | 2 |
| Stimuli     | - | +   | +    | + | + |
| PCA (50 μM) | - | -   | +    | - | + |

Figure2B E-cadherin

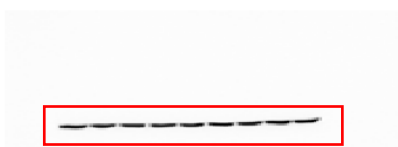

|             |   |     |      |   |   |
|-------------|---|-----|------|---|---|
| Time (hour) | - | 0.5 | 0.75 | 1 | 2 |
| Stimuli     | - | +   | +    | + | + |
| PCA (50 μM) | - | -   | +    | - | + |

Figure2B β-actin

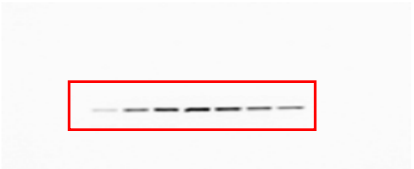

|             |   |      |     |   |   |    |    |
|-------------|---|------|-----|---|---|----|----|
| Time (hour) | - | 0.25 | 0.5 | 1 | 2 | 12 | 24 |
| Stimuli     | - | +    | +   | + | + | +  | +  |

Figure3A p-p65

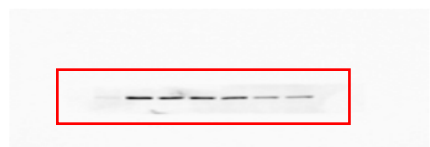

|             |   |      |     |   |   |    |    |
|-------------|---|------|-----|---|---|----|----|
| Time (hour) | - | 0.25 | 0.5 | 1 | 2 | 12 | 24 |
| Stimuli     | - | +    | +   | + | + | +  | +  |

Figure3A p65

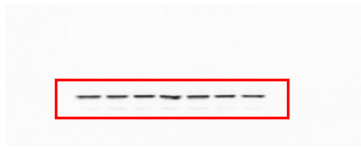

Time (hour) - 0.25 0.5 1 2 12 24  
 Stimuli - + + + + + +

Figure3A Lamin B1

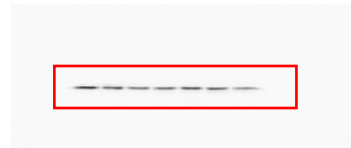

Time (hour) - 0.25 0.5 1 2 12 24  
 Stimuli - + + + + + +

Figure3B IκBα

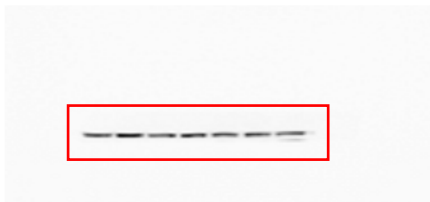

Time (hour) - 0.25 0.5 1 2 12 24  
 Stimuli - + + + + + +

Figure3B IKKα/β

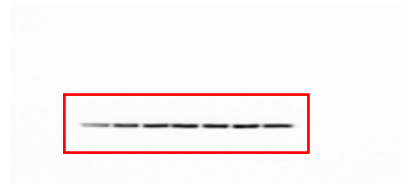

Time (hour) - 0.25 0.5 1 2 12 24  
 Stimuli - + + + + + +

Figure3B p-IKKα/β

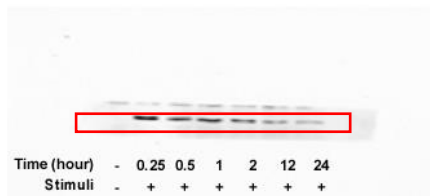

Time (hour) - 0.25 0.5 1 2 12 24  
 Stimuli - + + + + + +

Figure3B p-IκBα

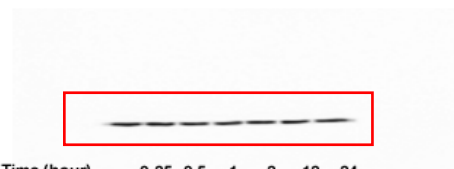

Time (hour) - 0.25 0.5 1 2 12 24  
 Stimuli - + + + + + +

Figure3B α/β Tubulin

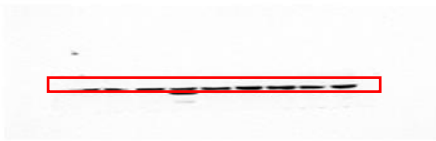

|                  |   |     |   |      |   |   |   |   |   |
|------------------|---|-----|---|------|---|---|---|---|---|
| Time (hour)      | - | 0.5 |   | 0.75 |   | 1 |   | 2 |   |
| Stimuli          | - | +   | + | +    | + | + | + | + | + |
| PCA (50 $\mu$ M) | - | -   | + | -    | + | - | + | - | + |

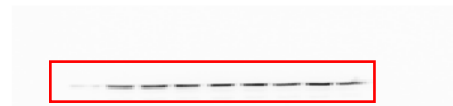

|                  |   |     |   |      |   |   |   |   |   |
|------------------|---|-----|---|------|---|---|---|---|---|
| Time (hour)      | - | 0.5 |   | 0.75 |   | 1 |   | 2 |   |
| Stimuli          | - | +   | + | +    | + | + | + | + | + |
| PCA (50 $\mu$ M) | - | -   | + | -    | + | - | + | - | + |

Figure3C Lamin B1

Figure3C p65

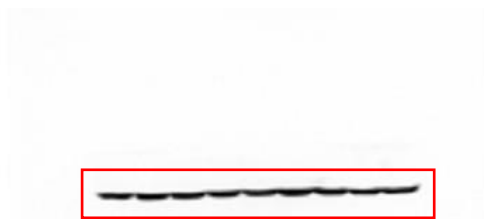

|                  |   |     |   |      |   |   |   |   |   |
|------------------|---|-----|---|------|---|---|---|---|---|
| Time (hour)      | - | 0.5 |   | 0.75 |   | 1 |   | 2 |   |
| Stimuli          | - | +   | + | +    | + | + | + | + | + |
| PCA (50 $\mu$ M) | - | -   | + | -    | + | - | + | - | + |

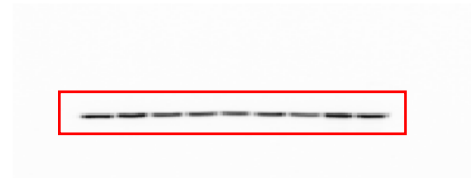

|                  |   |     |   |      |   |   |   |   |   |
|------------------|---|-----|---|------|---|---|---|---|---|
| Time (hour)      | - | 0.5 |   | 0.75 |   | 1 |   | 2 |   |
| Stimuli          | - | +   | + | +    | + | + | + | + | + |
| PCA (50 $\mu$ M) | - | -   | + | -    | + | - | + | - | + |

Figure3D  $\beta$ -actin

Figure3D I $\kappa$ B $\alpha$

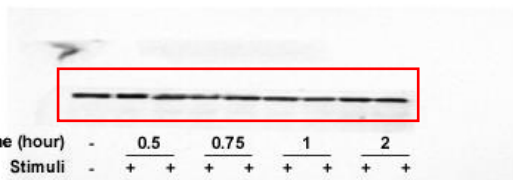

|                  |   |     |   |      |   |   |   |   |   |
|------------------|---|-----|---|------|---|---|---|---|---|
| Time (hour)      | - | 0.5 |   | 0.75 |   | 1 |   | 2 |   |
| Stimuli          | - | +   | + | +    | + | + | + | + | + |
| PCA (50 $\mu$ M) | - | -   | + | -    | + | - | + | - | + |

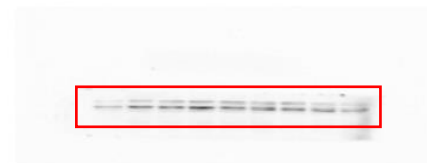

|                  |   |     |   |      |   |   |   |   |   |
|------------------|---|-----|---|------|---|---|---|---|---|
| Time (hour)      | - | 0.5 |   | 0.75 |   | 1 |   | 2 |   |
| Stimuli          | - | +   | + | +    | + | + | + | + | + |
| PCA (50 $\mu$ M) | - | -   | + | -    | + | - | + | - | + |

Figure3D IKK $\alpha/\beta$

Figure3D p-IKK $\alpha/\beta$

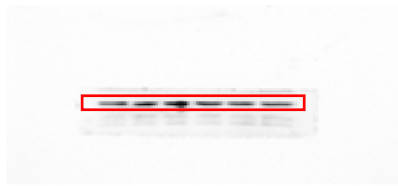

|            |   |   |    |    |    |    |
|------------|---|---|----|----|----|----|
| Time (min) | - | 5 | 10 | 15 | 20 | 30 |
| Stimuli    | - | + | +  | +  | +  | +  |

Figure4A p-MLC

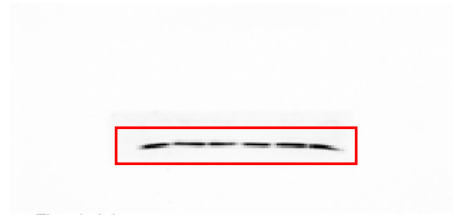

|            |   |   |    |    |    |    |
|------------|---|---|----|----|----|----|
| Time (min) | - | 5 | 10 | 15 | 20 | 30 |
| Stimuli    | - | + | +  | +  | +  | +  |

Figure4A MLC

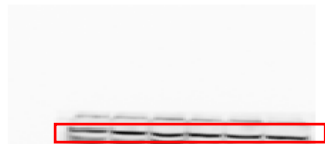

|            |   |   |    |    |    |    |
|------------|---|---|----|----|----|----|
| Time (min) | - | 5 | 10 | 15 | 20 | 30 |
| Stimuli    | - | + | +  | +  | +  | +  |

Figure4A MLCK

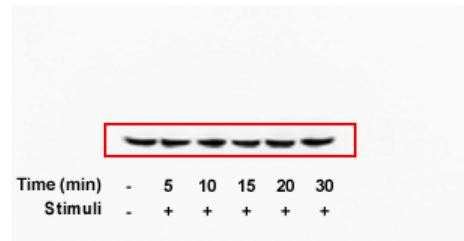

|            |   |   |    |    |    |    |
|------------|---|---|----|----|----|----|
| Time (min) | - | 5 | 10 | 15 | 20 | 30 |
| Stimuli    | - | + | +  | +  | +  | +  |

Figure4A  $\beta$ -actin

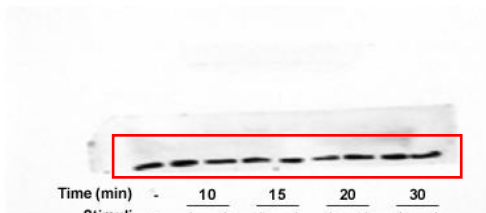

|                  |   |    |   |    |   |    |   |    |   |
|------------------|---|----|---|----|---|----|---|----|---|
| Time (min)       | - | 10 |   | 15 |   | 20 |   | 30 |   |
| Stimuli          | - | +  | + | +  | + | +  | + | +  | + |
| PCA (50 $\mu$ M) | - | -  | + | -  | + | -  | + | -  | + |

Figure4B MLC

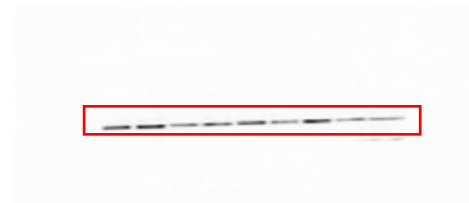

|                  |   |    |   |    |   |    |   |    |   |
|------------------|---|----|---|----|---|----|---|----|---|
| Time (min)       | - | 10 |   | 15 |   | 20 |   | 30 |   |
| Stimuli          | - | +  | + | +  | + | +  | + | +  | + |
| PCA (50 $\mu$ M) | - | -  | + | -  | + | -  | + | -  | + |

Figure4B MLCK

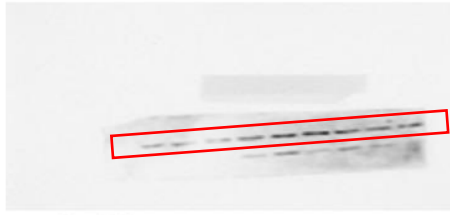

|                  |   |    |   |    |   |    |   |    |   |
|------------------|---|----|---|----|---|----|---|----|---|
| Time (min)       | - | 10 |   | 15 |   | 20 |   | 30 |   |
| Stimuli          | - | +  | + | +  | + | +  | + | +  | + |
| PCA (50 $\mu$ M) | - | -  | + | -  | + | -  | + | -  | + |

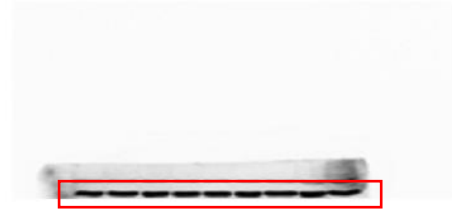

|                  |   |    |   |    |   |    |   |    |   |
|------------------|---|----|---|----|---|----|---|----|---|
| Time (min)       | - | 10 |   | 15 |   | 20 |   | 30 |   |
| Stimuli          | - | +  | + | +  | + | +  | + | +  | + |
| PCA (50 $\mu$ M) | - | -  | + | -  | + | -  | + | -  | + |

Figure4B MLC

Figure4B  $\beta$ -actin

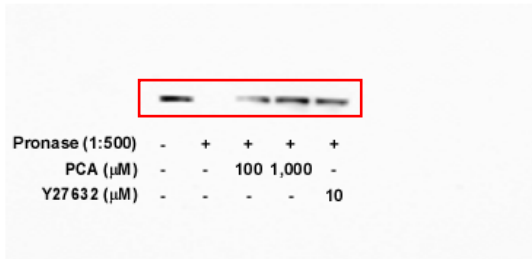

|                   |   |   |     |       |    |
|-------------------|---|---|-----|-------|----|
| Pronase (1:500)   | - | + | +   | +     | +  |
| PCA ( $\mu$ M)    | - | - | 100 | 1,000 | -  |
| Y27632 ( $\mu$ M) | - | - | -   | -     | 10 |

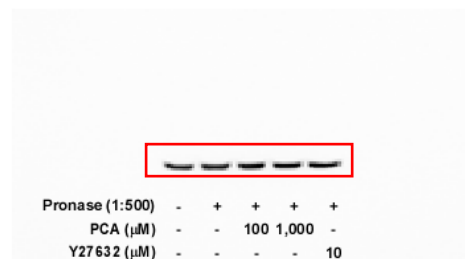

|                   |   |   |     |       |    |
|-------------------|---|---|-----|-------|----|
| Pronase (1:500)   | - | + | +   | +     | +  |
| PCA ( $\mu$ M)    | - | - | 100 | 1,000 | -  |
| Y27632 ( $\mu$ M) | - | - | -   | -     | 10 |

Figure4C ROCK1

Figure4C  $\beta$ -actin

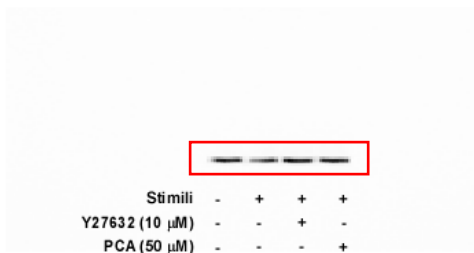

|                     |   |   |   |   |
|---------------------|---|---|---|---|
| Stimuli             | - | + | + | + |
| Y27632 (10 $\mu$ M) | - | - | + | - |
| PCA (50 $\mu$ M)    | - | - | - | + |

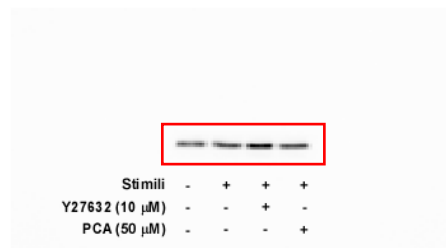

|                     |   |   |   |   |
|---------------------|---|---|---|---|
| Stimuli             | - | + | + | + |
| Y27632 (10 $\mu$ M) | - | - | + | - |
| PCA (50 $\mu$ M)    | - | - | - | + |

Figure5D ZO-1

Figure5D Occludin

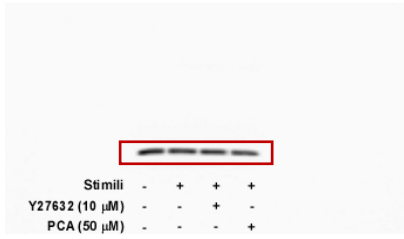

Figure5D Claudin-2

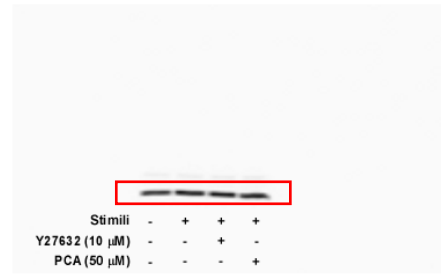

Figure5D Claudin-4

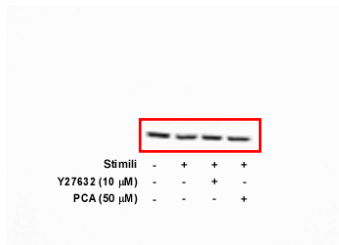

Figure5D  $\beta$ -actin

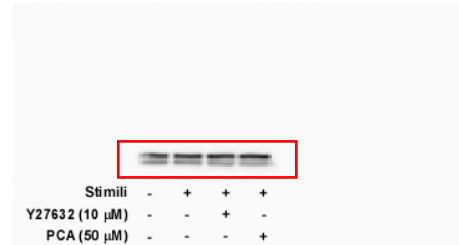

Figure5D E-cadherin

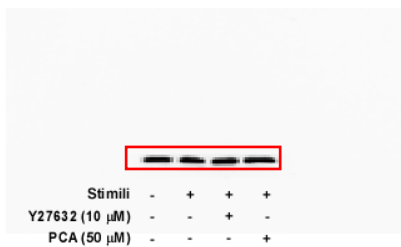

Figure5E MLC

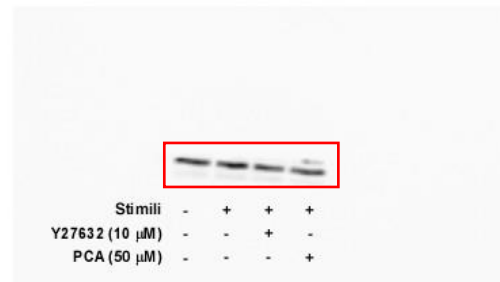

Figure5E MLCK

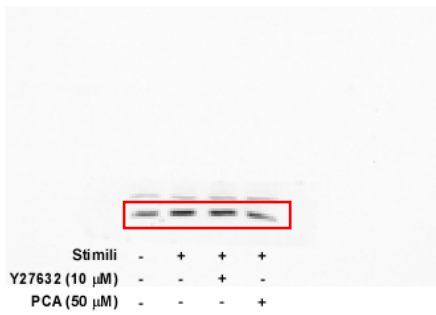

Figure5E p-MLC

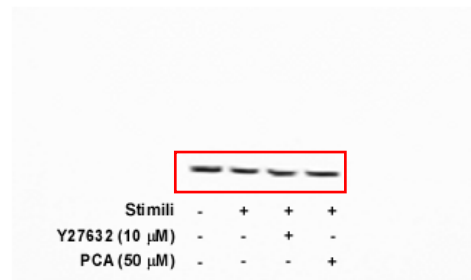

Figure5E  $\beta$ -actin

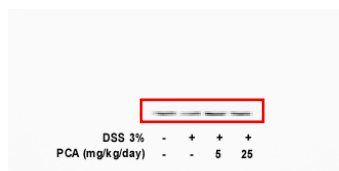

Figure6E ZO-1

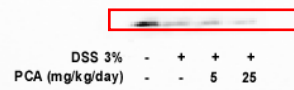

Figure6E Occludin

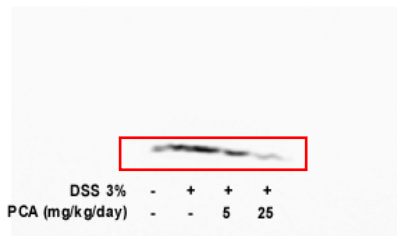

Figure6E Claudin-2

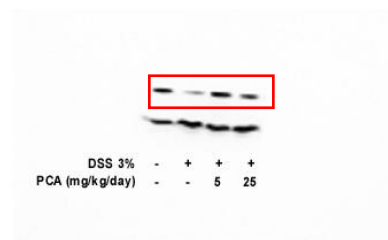

Figure6E Claudin-4



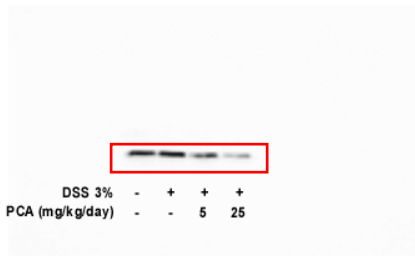

Figure6E E-cadherin

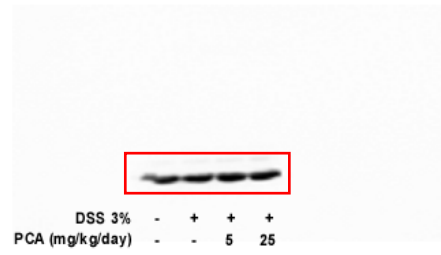

Figure6E  $\beta$ -actin
