# Supplementary figures and images for: Dietary protocatechuic acid redistributes tight junction proteins by targeting Rho-associated protein kinase to improve intestinal barrier function
Source: Royal Society of Chemistry journal article supplement (doi:10.1039/d3fo00605k), 2023-01-01

**A**

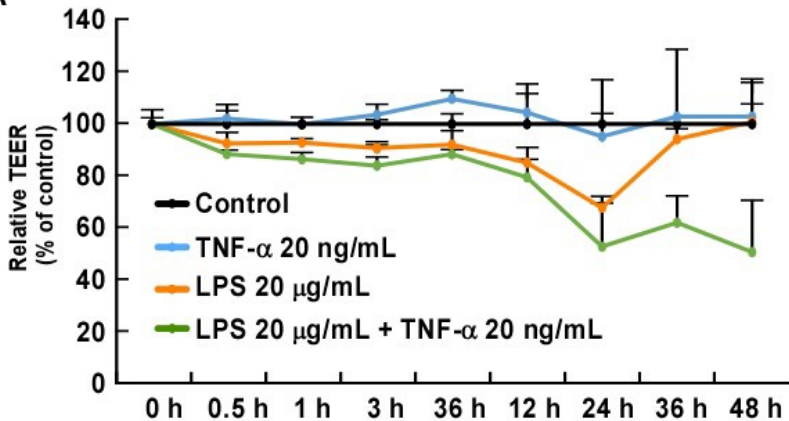

**B**

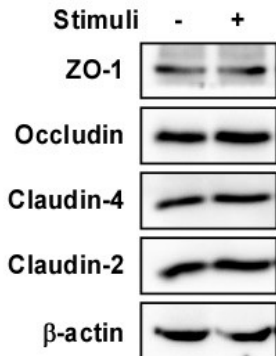

Supplement: d3fo00605k2.pdf [file d3fo00605k2.pdf]
